# Supplementary material
Source: PubMed Central journal article supplement (PMC7274274)
Supplement: CJN.13201019SupplementaryData.pdf [file CJN.13201019SupplementaryData.pdf]

## **Supplemental Material Table of Contents**

### **Supplemental Table 1. Kidney functional MRI acquisition parameters**

### **Supplemental Table 2. Mean annual eGFR slope by tertiles of baseline kidney functional MRI biomarkers**

### **Supplemental Table 3. Association of baseline cortical ADC and cortical R2\* with change in eGFR over time**

### **Supplemental Table 4. Associations of whole-kidney ADC, whole-kidney R2\*, and medullary R2\* with change in eGFR over time**

### **Supplemental Table 5. Associations of kidney functional MRI measurements with rapid CKD progression**

### **Supplemental Table 6. Kidney functional MRI measurements by treatment group among participants with baseline and follow-up functional MRI**

### **Supplemental Figure 1. Flow diagram for inclusion/exclusion of participants in kidney functional MRI sub-study of the COMBINE trial**

## **Kidney Functional Magnetic Resonance Imaging and Change in eGFR in Individuals with CKD**

Anand Srivastava, MD, MPH<sup>1</sup>; Xuan Cai, MS<sup>1</sup>; Jungwha Lee, PhD, MPH<sup>1</sup>; Wei Li, MD<sup>2</sup>; Brett Larive, MS<sup>3</sup>; Cynthia Kendrick, BS<sup>3</sup>; Jennifer J. Gassman, PhD<sup>3</sup>; John P. Middleton, MD<sup>4</sup>; James Carr, MD<sup>5</sup>; Kalani L. Raphael, MD, MS<sup>6</sup>; Alfred K. Cheung, MD<sup>6</sup>; Dominic S. Raj, MD<sup>7</sup>; Michel Chonchol, MD<sup>8</sup>; Linda F. Fried, MD, MPH<sup>9</sup>; Geoffrey A. Block, MD<sup>10</sup>; Stuart M. Sprague, DO<sup>2</sup>; Myles Wolf, MD, MMSc<sup>4</sup>; Joachim H. Ix, MD, MAS<sup>11</sup>; Pottumarthi V. Prasad, PhD<sup>2\*</sup>; Tamara Isakova, MD, MMSc<sup>1\*</sup>

\*Both authors contributed to this work equally

<sup>1</sup>Division of Nephrology and Hypertension, Center for Translational Metabolism and Health, Institute for Public Health and Medicine, Northwestern University Feinberg School of Medicine, Chicago, IL

<sup>2</sup>NorthShore University HealthSystem, Evanston, IL

<sup>3</sup>Cleveland Clinic, Cleveland, OH

<sup>4</sup>Duke University School of Medicine, Durham, NC

<sup>5</sup>Department of Radiology, Northwestern University Feinberg School of Medicine, Chicago, IL

<sup>6</sup>University of Utah School of Medicine, Salt Lake City, UT

<sup>7</sup>George Washington University School of Medicine and Health Sciences, Washington, DC

<sup>8</sup>University of Colorado Denver School of Medicine, Aurora, CO

<sup>9</sup>University of Pittsburgh School of Medicine, Pittsburgh, PA

<sup>10</sup>Reata Pharmaceuticals, Dallas, TX

<sup>11</sup>University of California San Diego School of Medicine, San Diego, CA

**Supplemental Table 1. Kidney functional MRI acquisition parameters**

| <b>Acquisition parameter</b>                  | <b>Diffusion-weighted MRI</b> | <b>BOLD MRI</b>             |
|-----------------------------------------------|-------------------------------|-----------------------------|
| <b>Field of view, mm</b>                      | 400                           | 400                         |
| <b>Matrix</b>                                 | 192 x 192                     | 192 x 192                   |
| <b>Repetition time, ms</b>                    | 3000                          | 61                          |
| <b>Echo time, ms</b>                          | 78                            | 4.92 – 39.6; step size 4.92 |
| <b>Bandwidth, Hz/pixel</b>                    | 1532                          | 260                         |
| <b>Flip angle</b>                             | 90°                           | 30°                         |
| <b>Slice orientation</b>                      | Coronal                       | Coronal                     |
| <b>Slice thickness, mm</b>                    | 5                             | 5                           |
| <b># Slice</b>                                | 5                             | 5                           |
| <b>Averages</b>                               | 5                             | 1                           |
| <b>Diffusion factor (b), s/mm<sup>2</sup></b> | 200, 300, 500, 700, 1000      | n/a                         |

**Supplemental Table 2. Mean annual eGFR slope by tertiles of baseline kidney functional MRI biomarkers**

|                                | Model 1                 |             |             | Model 2                 |             |             | Model 3                 |             |             |
|--------------------------------|-------------------------|-------------|-------------|-------------------------|-------------|-------------|-------------------------|-------------|-------------|
|                                | eGFR slope <sup>a</sup> | 95% CI      | P for trend | eGFR slope <sup>a</sup> | 95% CI      | P for trend | eGFR slope <sup>b</sup> | 95% CI      | P for trend |
| <b>ADC</b>                     |                         |             |             |                         |             |             |                         |             |             |
| <b>Tertile 1 (0.8 – 1.40)</b>  | -2.6                    | -7.2 – 2.1  |             | -2.6                    | -7.2 – 2.1  |             | -2.6                    | -7.1 – 1.9  |             |
| <b>Tertile 2 (1.41 – 1.51)</b> | -2.7                    | -7.3 – 1.9  | 0.55        | -2.7                    | -7.3 – 1.8  | 0.50        | -2.3                    | -6.8 – 2.2  | 0.94        |
| <b>Tertile 3 (1.52 – 1.95)</b> | -1.9                    | -3.7 – 0.02 |             | -1.8                    | -3.6 – 0.1  |             | -2.2                    | -4.0 – -0.4 |             |
| <b>R2*</b>                     |                         |             |             |                         |             |             |                         |             |             |
| <b>Tertile 1 (13.1 – 18.9)</b> | -2.6                    | -4.6 – -0.5 |             | -2.5                    | -4.5 – -0.5 |             | -2.3                    | -4.3 – -0.4 |             |
| <b>Tertile 2 (18.9 – 21.2)</b> | -3.1                    | -7.9 – 1.8  | 0.36        | -3.1                    | -7.9 – 1.7  | 0.37        | -3.2                    | -7.8 – 1.4  | 0.52        |
| <b>Tertile 3 (21.2 – 33.3)</b> | -1.3                    | -6.1 – 3.6  |             | -1.2                    | -6.0 – 3.6  |             | -1.5                    | -6.1 – 3.1  |             |

Cortical ADC and R2\* are reported in ( $\times 10^{-3}$  mm<sup>2</sup>/s) and (s<sup>-1</sup>), respectively.

<sup>a</sup> This estimate reflects the mean annual eGFR slope for each respective MRI biomarker tertile.

<sup>b</sup> This estimate reflects the mean annual eGFR slope for each respective MRI biomarker tertile where natural log transformed UACR is centered around the mean.

Model 1 is unadjusted

Model 2 is adjusted for age, sex, race, diabetes status, treatment group (active treatment vs placebo), study center, baseline hemoglobin, baseline log transformed UACR, and baseline eGFR

Model 3 is model 2 and further adjusts for the interaction of natural log transformed UACR x time

**Supplemental Table 3. Association of baseline cortical ADC and cortical R2\* with change in eGFR over time**

|                     | <b>Model 1</b>                       |          | <b>Model 2</b>                       |          | <b>Model 3</b>                       |          |
|---------------------|--------------------------------------|----------|--------------------------------------|----------|--------------------------------------|----------|
|                     | <b><math>\beta^a</math> (95% CI)</b> | <b>P</b> | <b><math>\beta^a</math> (95% CI)</b> | <b>P</b> | <b><math>\beta^a</math> (95% CI)</b> | <b>P</b> |
| <b>Cortical ADC</b> | 1.2 (-0.1 – 2.4)                     | 0.06     | 1.2 (0.01 – 2.4)                     | 0.05     | 1.0 (-0.1 – 2.2)                     | 0.09     |
| <b>Cortical R2*</b> | 0.4 (-0.7 – 1.6)                     | 0.44     | 0.4 (-0.7 – 1.5)                     | 0.46     | 0.4 (-0.7 – 1.4)                     | 0.51     |

<sup>a</sup> The  $\beta$  estimate is the difference in annual eGFR slope (ml/min/1.73m<sup>2</sup>/year) per 1 SD increase in the MRI biomarker of interest from the respective MRI biomarker x time interaction term. P-values are from the interaction term of each respective MRI biomarker x time. Cortical ADC and R2\* are reported in ( $\times 10^{-3}$  mm<sup>2</sup>/s) and (s<sup>-1</sup>), respectively. Time is measured in years.

Model 1 is unadjusted

Model 2 is adjusted for age, sex, race, diabetes status, treatment group (active treatment vs placebo), study center, baseline hemoglobin, baseline log transformed UACR, and baseline eGFR

Model 3 is model 2 and further adjusts for the interaction of natural log transformed UACR x time

**Supplemental Table 4. Associations of whole-kidney ADC, whole-kidney R2\*, and medullary R2\* with change in eGFR over time**

|                         | <b>Model 1</b>                |          | <b>Model 2</b>                |          | <b>Model 3</b>                |          |
|-------------------------|-------------------------------|----------|-------------------------------|----------|-------------------------------|----------|
|                         | <b>β<sup>a</sup> (95% CI)</b> | <b>P</b> | <b>β<sup>a</sup> (95% CI)</b> | <b>P</b> | <b>β<sup>a</sup> (95% CI)</b> | <b>P</b> |
| <b>Whole-kidney ADC</b> | 1.1 (-0.1 – 2.3)              | 0.06     | 1.2 (-0.01 – 2.4)             | 0.05     | 1.0 (-0.2 – 2.1)              | 0.09     |
| <b>Whole-kidney R2*</b> | 0.7 (-0.4 – 1.8)              | 0.22     | 0.7 (-0.4 – 1.8)              | 0.23     | 0.5 (-0.6 – 1.5)              | 0.41     |
| <b>Medullary R2*</b>    | 1.0 (-0.2 – 2.2)              | 0.11     | 0.9 (-0.2 – 2.1)              | 0.12     | 0.5 (-0.7 – 1.7)              | 0.38     |

<sup>a</sup> The β estimate is the difference in annual eGFR slope (ml/min/1.73m<sup>2</sup>/year) per 1 SD increase in the MRI biomarker of interest from the respective MRI biomarker x time interaction term. P-values are from the interaction term of each respective MRI biomarker x time. ADC and R2\* are reported in (x 10<sup>-3</sup> mm<sup>2</sup>/s) and (s<sup>-1</sup>), respectively. Time is measured in years.

Model 1 is unadjusted

Model 2 is adjusted for age, sex, race, diabetes status, treatment group (active treatment vs placebo), study center, baseline hemoglobin, baseline log transformed UACR, and baseline eGFR

Model 3 is model 2 and further adjusts for the interaction of natural log transformed UACR x time

**Supplemental Table 5. Associations of kidney functional MRI measurements with rapid CKD progression**

| Outcome                                               | No. of Events | Cortical ADC ( $\times 10^{-3} \text{ mm}^2/\text{s}$ ) <sup>a</sup> |                    | Cortical R2* ( $\text{s}^{-1}$ ) <sup>b</sup> |                    |
|-------------------------------------------------------|---------------|----------------------------------------------------------------------|--------------------|-----------------------------------------------|--------------------|
|                                                       |               | Unadjusted                                                           | Adjusted*          | Unadjusted                                    | Adjusted*          |
| <b>Kidney failure or death</b>                        | <b>6</b>      | 2.41 (1.19 – 4.87)                                                   | 2.37 (1.03 – 5.48) | 0.49 (0.18 – 1.36)                            | 0.55 (0.16 – 1.83) |
| <b>eGFR loss &gt; 3 ml/min/1.73m<sup>2</sup>/year</b> | <b>25</b>     | 1.43 (0.93 – 2.21)                                                   | 1.29 (0.82 – 2.04) | 0.80 (0.49 – 1.31)                            | 0.81 (0.48 – 1.37) |

eGFR loss was calculated by annual subject-specific eGFR slope from mixed-effects models.

<sup>a</sup> Measures of association presented as odds ratio with (95% CI) per 1 standard deviation decrease in cortical ADC.

<sup>b</sup> Measures of association presented as odds ratio with (95% CI) per 1 standard deviation increase in cortical R2\*.

\*Model is adjusted for baseline eGFR and baseline natural log transformed UACR

**Supplemental Table 6. Kidney functional MRI measurements by treatment group among participants with baseline and follow-up functional MRI**

| <b>MRI Visit</b>                                         | <b>All patients<br/>N = 87</b> | <b>Active Treatment<br/>N = 61</b> | <b>Placebo<br/>N = 26</b> | <b>P</b> |
|----------------------------------------------------------|--------------------------------|------------------------------------|---------------------------|----------|
| <b>Cortical ADC (x 10<sup>-3</sup> mm<sup>2</sup>/s)</b> |                                |                                    |                           |          |
| Baseline                                                 | 1.46 ± 0.16                    | 1.45 ± 0.16                        | 1.50 ± 0.18               | 0.21     |
| Month 12                                                 | 1.49 ± 0.17                    | 1.50 ± 0.17                        | 1.48 ± 0.19               | 0.64     |
| Δ                                                        | 0.03 ± 0.13                    | 0.05 ± 0.11                        | -0.02 ± 0.15              | 0.02     |
| <b>Cortical R2* (s<sup>-1</sup>)</b>                     |                                |                                    |                           |          |
| Baseline                                                 | 20.6 ± 3.4                     | 20.9 ± 3.6                         | 19.8 ± 2.5                | 0.11     |
| Month 12                                                 | 20.8 ± 3.1                     | 21.0 ± 3.4                         | 20.2 ± 2.2                | 0.22     |
| Δ                                                        | 0.2 ± 2.6                      | 0.1 ± 2.7                          | 0.4 ± 2.4                 | 0.64     |

Participants in the active treatment group received either lanthanum carbonate and nicotinamide, lanthanum carbonate and nicotinamide placebo, or lanthanum carbonate placebo and nicotinamide. Participants in the placebo group received double placebo treatment.

Data presented as mean ± standard deviation for cortical ADC and R2\* measurements at baseline and month 12 visits.

P values compare active treatment vs placebo groups.

Abbreviations: MRI, magnetic resonance imaging

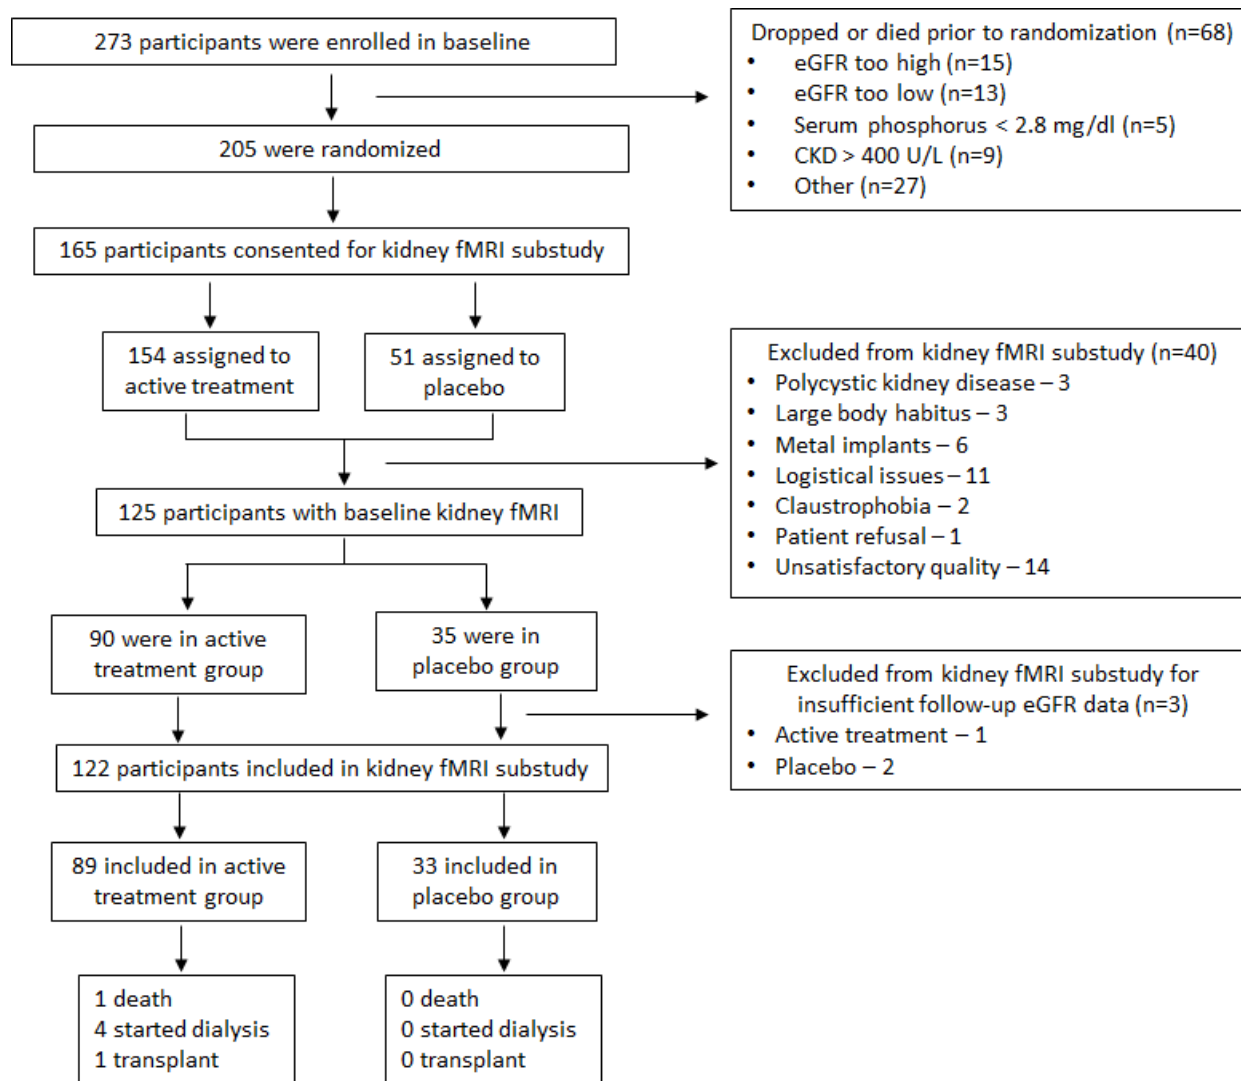

**Supplemental Figure 1. Flow diagram for inclusion/exclusion of participants in kidney functional MRI substudy of the COMBINE trial**
